# Supplementary material
Source: publisher site journal article supplement (https://www.spandidos-publications.com/5236/downloadSupplementary)
Supplement: Supplementary file 1 [file downloadSupplementary]

## Sheet: Table SV
Table SV. Predicted proteases involved in the proteolysis of UMOD-P3.
Peptide ID	Parent protein AC from input	Start amino acid	End amino acid	N or C-terminus	Protease Human/Mouse/Rat	Cleavage site	Source	Plausible proteolysis	Probability calculated	Threshold applied (value)	Sensitivity	Specificity
UMOD-P3	P07911	596	599	C-terminus	CTSD (P07339; CATD_HUMAN). Ctsd (P18242; CATD_MOUSE). Ctsd (P24268; CATD_RAT)	SRVLNLGP	MEROPS:A01.009	Endopeptidase (input)	-20.78	MEROPS score threshold (-22.64)	79	84.74
UMOD-P3	P07911	600	605	N-terminus	CTSD (P07339; CATD_HUMAN). Ctsd (P18242; CATD_MOUSE). Ctsd (P24268; CATD_RAT)	SRVLNLGP	MEROPS:A01.009	Endopeptidase (input)	-20.78	MEROPS score threshold (-22.64)	79	84.74
UMOD-P3	P07911	600	604	N-terminus	CTSD (P07339; CATD_HUMAN). Ctsd (P18242; CATD_MOUSE). Ctsd (P24268; CATD_RAT)	SRVLNLGP	MEROPS:A01.009	Endopeptidase (input)	-20.78	MEROPS score threshold (-22.64)	79	84.74
UMOD-P3	P07911	600	603	N-terminus	CTSD (P07339; CATD_HUMAN). Ctsd (P18242; CATD_MOUSE). Ctsd (P24268; CATD_RAT)	SRVLNLGP	MEROPS:A01.009	Endopeptidase (input)	-20.78	MEROPS score threshold (-22.64)	79	84.74
UMOD-P3	P07911	600	606	N-terminus	CTSD (P07339; CATD_HUMAN). Ctsd (P18242; CATD_MOUSE). Ctsd (P24268; CATD_RAT)	SRVLNLGP	MEROPS:A01.009	Endopeptidase (input)	-20.78	MEROPS score threshold (-22.64)	79	84.74
UMOD-P3	P07911	595	599	C-terminus	CTSD (P07339; CATD_HUMAN). Ctsd (P18242; CATD_MOUSE). Ctsd (P24268; CATD_RAT)	SRVLNLGP	MEROPS:A01.009	Endopeptidase (input)	-20.78	MEROPS score threshold (-22.64)	79	84.74
UMOD-P3	P07911	596	599	C-terminus	CTSE (P14091; CATE_HUMAN). Ctse (P16228; CATE_RAT). Ctse (P70269; CATE_MOUSE)	SRVLNLGP	MEROPS:A01.010	Endopeptidase (input)	-21.36	MEROPS score threshold (-22.27)	71	87.48
UMOD-P3	P07911	600	605	N-terminus	CTSE (P14091; CATE_HUMAN). Ctse (P16228; CATE_RAT). Ctse (P70269; CATE_MOUSE)	SRVLNLGP	MEROPS:A01.010	Endopeptidase (input)	-21.36	MEROPS score threshold (-22.27)	71	87.48
UMOD-P3	P07911	600	604	N-terminus	CTSE (P14091; CATE_HUMAN). Ctse (P16228; CATE_RAT). Ctse (P70269; CATE_MOUSE)	SRVLNLGP	MEROPS:A01.010	Endopeptidase (input)	-21.36	MEROPS score threshold (-22.27)	71	87.48
UMOD-P3	P07911	600	603	N-terminus	CTSE (P14091; CATE_HUMAN). Ctse (P16228; CATE_RAT). Ctse (P70269; CATE_MOUSE)	SRVLNLGP	MEROPS:A01.010	Endopeptidase (input)	-21.36	MEROPS score threshold (-22.27)	71	87.48
UMOD-P3	P07911	600	606	N-terminus	CTSE (P14091; CATE_HUMAN). Ctse (P16228; CATE_RAT). Ctse (P70269; CATE_MOUSE)	SRVLNLGP	MEROPS:A01.010	Endopeptidase (input)	-21.36	MEROPS score threshold (-22.27)	71	87.48
UMOD-P3	P07911	595	599	C-terminus	CTSE (P14091; CATE_HUMAN). Ctse (P16228; CATE_RAT). Ctse (P70269; CATE_MOUSE)	SRVLNLGP	MEROPS:A01.010	Endopeptidase (input)	-21.36	MEROPS score threshold (-22.27)	71	87.48
UMOD-P3	P07911	596	605	C-terminus	Ctsb (P00787; CATB_RAT). CTSB (P07858; CATB_HUMAN). Ctsb (P10605; CATB_MOUSE)	GPITRKGV	MEROPS:C01.060	Endopeptidase (input)	-22.6	MEROPS score threshold (-23.76)	79	80.99
UMOD-P3	P07911	596	600	C-terminus	Ctsb (P00787; CATB_RAT). CTSB (P07858; CATB_HUMAN). Ctsb (P10605; CATB_MOUSE)	RVLNLGPI	MEROPS:C01.060	Endopeptidase (input)	-22.92	MEROPS score threshold (-23.76)	79	80.99
UMOD-P3	P07911	596	599	C-terminus	Ctsb (P00787; CATB_RAT). CTSB (P07858; CATB_HUMAN). Ctsb (P10605; CATB_MOUSE)	SRVLNLGP	MEROPS:C01.060	Endopeptidase (input)	-21.23	MEROPS score threshold (-23.76)	79	80.99
UMOD-P3	P07911	597	605	C-terminus	Ctsb (P00787; CATB_RAT). CTSB (P07858; CATB_HUMAN). Ctsb (P10605; CATB_MOUSE)	GPITRKGV	MEROPS:C01.060	Endopeptidase (input)	-22.6	MEROPS score threshold (-23.76)	79	80.99
UMOD-P3	P07911	597	600	C-terminus	Ctsb (P00787; CATB_RAT). CTSB (P07858; CATB_HUMAN). Ctsb (P10605; CATB_MOUSE)	RVLNLGPI	MEROPS:C01.060	Endopeptidase (input)	-22.92	MEROPS score threshold (-23.76)	79	80.99
UMOD-P3	P07911	598	605	C-terminus	Ctsb (P00787; CATB_RAT). CTSB (P07858; CATB_HUMAN). Ctsb (P10605; CATB_MOUSE)	GPITRKGV	MEROPS:C01.060	Endopeptidase (input)	-22.6	MEROPS score threshold (-23.76)	79	80.99
UMOD-P3	P07911	599	605	C-terminus	Ctsb (P00787; CATB_RAT). CTSB (P07858; CATB_HUMAN). Ctsb (P10605; CATB_MOUSE)	GPITRKGV	MEROPS:C01.060	Endopeptidase (input)	-22.6	MEROPS score threshold (-23.76)	79	80.99
UMOD-P3	P07911	600	605	N-terminus	Ctsb (P00787; CATB_RAT). CTSB (P07858; CATB_HUMAN). Ctsb (P10605; CATB_MOUSE)	SRVLNLGP	MEROPS:C01.060	Endopeptidase (input)	-21.23	MEROPS score threshold (-23.76)	79	80.99
UMOD-P3	P07911	600	605	C-terminus	Ctsb (P00787; CATB_RAT). CTSB (P07858; CATB_HUMAN). Ctsb (P10605; CATB_MOUSE)	GPITRKGV	MEROPS:C01.060	Endopeptidase (input)	-22.6	MEROPS score threshold (-23.76)	79	80.99
UMOD-P3	P07911	600	604	N-terminus	Ctsb (P00787; CATB_RAT). CTSB (P07858; CATB_HUMAN). Ctsb (P10605; CATB_MOUSE)	SRVLNLGP	MEROPS:C01.060	Endopeptidase (input)	-21.23	MEROPS score threshold (-23.76)	79	80.99
UMOD-P3	P07911	600	603	N-terminus	Ctsb (P00787; CATB_RAT). CTSB (P07858; CATB_HUMAN). Ctsb (P10605; CATB_MOUSE)	SRVLNLGP	MEROPS:C01.060	Endopeptidase (input)	-21.23	MEROPS score threshold (-23.76)	79	80.99
UMOD-P3	P07911	601	605	N-terminus	Ctsb (P00787; CATB_RAT). CTSB (P07858; CATB_HUMAN). Ctsb (P10605; CATB_MOUSE)	RVLNLGPI	MEROPS:C01.060	Endopeptidase (input)	-22.92	MEROPS score threshold (-23.76)	79	80.99
UMOD-P3	P07911	601	605	C-terminus	Ctsb (P00787; CATB_RAT). CTSB (P07858; CATB_HUMAN). Ctsb (P10605; CATB_MOUSE)	GPITRKGV	MEROPS:C01.060	Endopeptidase (input)	-22.6	MEROPS score threshold (-23.76)	79	80.99
UMOD-P3	P07911	601	604	N-terminus	Ctsb (P00787; CATB_RAT). CTSB (P07858; CATB_HUMAN). Ctsb (P10605; CATB_MOUSE)	RVLNLGPI	MEROPS:C01.060	Endopeptidase (input)	-22.92	MEROPS score threshold (-23.76)	79	80.99
UMOD-P3	P07911	602	605	C-terminus	Ctsb (P00787; CATB_RAT). CTSB (P07858; CATB_HUMAN). Ctsb (P10605; CATB_MOUSE)	GPITRKGV	MEROPS:C01.060	Endopeptidase (input)	-22.6	MEROPS score threshold (-23.76)	79	80.99
UMOD-P3	P07911	600	606	N-terminus	Ctsb (P00787; CATB_RAT). CTSB (P07858; CATB_HUMAN). Ctsb (P10605; CATB_MOUSE)	SRVLNLGP	MEROPS:C01.060	Endopeptidase (input)	-21.23	MEROPS score threshold (-23.76)	79	80.99
UMOD-P3	P07911	601	606	N-terminus	Ctsb (P00787; CATB_RAT). CTSB (P07858; CATB_HUMAN). Ctsb (P10605; CATB_MOUSE)	RVLNLGPI	MEROPS:C01.060	Endopeptidase (input)	-22.92	MEROPS score threshold (-23.76)	79	80.99
UMOD-P3	P07911	595	605	C-terminus	Ctsb (P00787; CATB_RAT). CTSB (P07858; CATB_HUMAN). Ctsb (P10605; CATB_MOUSE)	GPITRKGV	MEROPS:C01.060	Endopeptidase (input)	-22.6	MEROPS score threshold (-23.76)	79	80.99
UMOD-P3	P07911	595	600	C-terminus	Ctsb (P00787; CATB_RAT). CTSB (P07858; CATB_HUMAN). Ctsb (P10605; CATB_MOUSE)	RVLNLGPI	MEROPS:C01.060	Endopeptidase (input)	-22.92	MEROPS score threshold (-23.76)	79	80.99
UMOD-P3	P07911	595	599	C-terminus	Ctsb (P00787; CATB_RAT). CTSB (P07858; CATB_HUMAN). Ctsb (P10605; CATB_MOUSE)	SRVLNLGP	MEROPS:C01.060	Endopeptidase (input)	-21.23	MEROPS score threshold (-23.76)	79	80.99
UMOD-P3	P07911	598	605	N-terminus	Casp1 (P29452; CASP1_MOUSE). CASP1 (P29466; CASP1_HUMAN). Casp1 (P43527; CASP1_RAT)	DQSRVLNL	MEROPS:C14.001	Endopeptidase (input)	-21.89	MEROPS score threshold (-22.04)	95	96.19
UMOD-P3	P07911	598	604	N-terminus	Casp1 (P29452; CASP1_MOUSE). CASP1 (P29466; CASP1_HUMAN). Casp1 (P43527; CASP1_RAT)	DQSRVLNL	MEROPS:C14.001	Endopeptidase (input)	-21.89	MEROPS score threshold (-22.04)	95	96.19
UMOD-P3	P07911	598	603	N-terminus	Casp1 (P29452; CASP1_MOUSE). CASP1 (P29466; CASP1_HUMAN). Casp1 (P43527; CASP1_RAT)	DQSRVLNL	MEROPS:C14.001	Endopeptidase (input)	-21.89	MEROPS score threshold (-22.04)	95	96.19
UMOD-P3	P07911	598	602	N-terminus	Casp1 (P29452; CASP1_MOUSE). CASP1 (P29466; CASP1_HUMAN). Casp1 (P43527; CASP1_RAT)	DQSRVLNL	MEROPS:C14.001	Endopeptidase (input)	-21.89	MEROPS score threshold (-22.04)	95	96.19
UMOD-P3	P07911	598	601	N-terminus	Casp1 (P29452; CASP1_MOUSE). CASP1 (P29466; CASP1_HUMAN). Casp1 (P43527; CASP1_RAT)	DQSRVLNL	MEROPS:C14.001	Endopeptidase (input)	-21.89	MEROPS score threshold (-22.04)	95	96.19
UMOD-P3	P07911	598	606	N-terminus	Casp1 (P29452; CASP1_MOUSE). CASP1 (P29466; CASP1_HUMAN). Casp1 (P43527; CASP1_RAT)	DQSRVLNL	MEROPS:C14.001	Endopeptidase (input)	-21.89	MEROPS score threshold (-22.04)	95	96.19
UMOD-P3	P07911	596	605	C-terminus	Mmp8 (O70138; MMP8_MOUSE). Mmp8 (O88766; MMP8_RAT). MMP8 (P22894; MMP8_HUMAN)	GPITRKGV	MEROPS:M10.002	Endopeptidase (input)	-20.41	MEROPS score threshold (-22.73)	38	90.6
UMOD-P3	P07911	597	605	C-terminus	Mmp8 (O70138; MMP8_MOUSE). Mmp8 (O88766; MMP8_RAT). MMP8 (P22894; MMP8_HUMAN)	GPITRKGV	MEROPS:M10.002	Endopeptidase (input)	-20.41	MEROPS score threshold (-22.73)	38	90.6
UMOD-P3	P07911	598	605	C-terminus	Mmp8 (O70138; MMP8_MOUSE). Mmp8 (O88766; MMP8_RAT). MMP8 (P22894; MMP8_HUMAN)	GPITRKGV	MEROPS:M10.002	Endopeptidase (input)	-20.41	MEROPS score threshold (-22.73)	38	90.6
UMOD-P3	P07911	599	605	N-terminus	Mmp8 (O70138; MMP8_MOUSE). Mmp8 (O88766; MMP8_RAT). MMP8 (P22894; MMP8_HUMAN)	QSRVLNLG	MEROPS:M10.002	Endopeptidase (input)	-22.6	MEROPS score threshold (-22.73)	38	90.6
UMOD-P3	P07911	599	605	C-terminus	Mmp8 (O70138; MMP8_MOUSE). Mmp8 (O88766; MMP8_RAT). MMP8 (P22894; MMP8_HUMAN)	GPITRKGV	MEROPS:M10.002	Endopeptidase (input)	-20.41	MEROPS score threshold (-22.73)	38	90.6
UMOD-P3	P07911	599	604	N-terminus	Mmp8 (O70138; MMP8_MOUSE). Mmp8 (O88766; MMP8_RAT). MMP8 (P22894; MMP8_HUMAN)	QSRVLNLG	MEROPS:M10.002	Endopeptidase (input)	-22.6	MEROPS score threshold (-22.73)	38	90.6
UMOD-P3	P07911	599	603	N-terminus	Mmp8 (O70138; MMP8_MOUSE). Mmp8 (O88766; MMP8_RAT). MMP8 (P22894; MMP8_HUMAN)	QSRVLNLG	MEROPS:M10.002	Endopeptidase (input)	-22.6	MEROPS score threshold (-22.73)	38	90.6
UMOD-P3	P07911	599	602	N-terminus	Mmp8 (O70138; MMP8_MOUSE). Mmp8 (O88766; MMP8_RAT). MMP8 (P22894; MMP8_HUMAN)	QSRVLNLG	MEROPS:M10.002	Endopeptidase (input)	-22.6	MEROPS score threshold (-22.73)	38	90.6
UMOD-P3	P07911	600	605	C-terminus	Mmp8 (O70138; MMP8_MOUSE). Mmp8 (O88766; MMP8_RAT). MMP8 (P22894; MMP8_HUMAN)	GPITRKGV	MEROPS:M10.002	Endopeptidase (input)	-20.41	MEROPS score threshold (-22.73)	38	90.6
UMOD-P3	P07911	601	605	C-terminus	Mmp8 (O70138; MMP8_MOUSE). Mmp8 (O88766; MMP8_RAT). MMP8 (P22894; MMP8_HUMAN)	GPITRKGV	MEROPS:M10.002	Endopeptidase (input)	-20.41	MEROPS score threshold (-22.73)	38	90.6
UMOD-P3	P07911	602	605	C-terminus	Mmp8 (O70138; MMP8_MOUSE). Mmp8 (O88766; MMP8_RAT). MMP8 (P22894; MMP8_HUMAN)	GPITRKGV	MEROPS:M10.002	Endopeptidase (input)	-20.41	MEROPS score threshold (-22.73)	38	90.6
UMOD-P3	P07911	599	606	N-terminus	Mmp8 (O70138; MMP8_MOUSE). Mmp8 (O88766; MMP8_RAT). MMP8 (P22894; MMP8_HUMAN)	QSRVLNLG	MEROPS:M10.002	Endopeptidase (input)	-22.6	MEROPS score threshold (-22.73)	38	90.6
UMOD-P3	P07911	595	605	C-terminus	Mmp8 (O70138; MMP8_MOUSE). Mmp8 (O88766; MMP8_RAT). MMP8 (P22894; MMP8_HUMAN)	GPITRKGV	MEROPS:M10.002	Endopeptidase (input)	-20.41	MEROPS score threshold (-22.73)	38	90.6
UMOD-P3	P07911	595	598	C-terminus	Mmp8 (O70138; MMP8_MOUSE). Mmp8 (O88766; MMP8_RAT). MMP8 (P22894; MMP8_HUMAN)	QSRVLNLG	MEROPS:M10.002	Endopeptidase (input)	-22.6	MEROPS score threshold (-22.73)	38	90.6
UMOD-P3	P07911	596	600	C-terminus	MMP2 (P08253; MMP2_HUMAN). Mmp2 (P33434; MMP2_MOUSE). Mmp2 (P33436; MMP2_RAT)	RVLNLGPI	MEROPS:M10.003	Endopeptidase (input)	-22.4	MEROPS score threshold (-22.7)	76	86.88
UMOD-P3	P07911	597	600	C-terminus	MMP2 (P08253; MMP2_HUMAN). Mmp2 (P33434; MMP2_MOUSE). Mmp2 (P33436; MMP2_RAT)	RVLNLGPI	MEROPS:M10.003	Endopeptidase (input)	-22.4	MEROPS score threshold (-22.7)	76	86.88
UMOD-P3	P07911	598	605	N-terminus	MMP2 (P08253; MMP2_HUMAN). Mmp2 (P33434; MMP2_MOUSE). Mmp2 (P33436; MMP2_RAT)	DQSRVLNL	MEROPS:M10.003	Endopeptidase (input)	-22.48	MEROPS score threshold (-22.7)	76	86.88
UMOD-P3	P07911	598	604	N-terminus	MMP2 (P08253; MMP2_HUMAN). Mmp2 (P33434; MMP2_MOUSE). Mmp2 (P33436; MMP2_RAT)	DQSRVLNL	MEROPS:M10.003	Endopeptidase (input)	-22.48	MEROPS score threshold (-22.7)	76	86.88
UMOD-P3	P07911	598	603	N-terminus	MMP2 (P08253; MMP2_HUMAN). Mmp2 (P33434; MMP2_MOUSE). Mmp2 (P33436; MMP2_RAT)	DQSRVLNL	MEROPS:M10.003	Endopeptidase (input)	-22.48	MEROPS score threshold (-22.7)	76	86.88
UMOD-P3	P07911	598	602	N-terminus	MMP2 (P08253; MMP2_HUMAN). Mmp2 (P33434; MMP2_MOUSE). Mmp2 (P33436; MMP2_RAT)	DQSRVLNL	MEROPS:M10.003	Endopeptidase (input)	-22.48	MEROPS score threshold (-22.7)	76	86.88
UMOD-P3	P07911	598	601	N-terminus	MMP2 (P08253; MMP2_HUMAN). Mmp2 (P33434; MMP2_MOUSE). Mmp2 (P33436; MMP2_RAT)	DQSRVLNL	MEROPS:M10.003	Endopeptidase (input)	-22.48	MEROPS score threshold (-22.7)	76	86.88
UMOD-P3	P07911	601	605	N-terminus	MMP2 (P08253; MMP2_HUMAN). Mmp2 (P33434; MMP2_MOUSE). Mmp2 (P33436; MMP2_RAT)	RVLNLGPI	MEROPS:M10.003	Endopeptidase (input)	-22.4	MEROPS score threshold (-22.7)	76	86.88
UMOD-P3	P07911	601	604	N-terminus	MMP2 (P08253; MMP2_HUMAN). Mmp2 (P33434; MMP2_MOUSE). Mmp2 (P33436; MMP2_RAT)	RVLNLGPI	MEROPS:M10.003	Endopeptidase (input)	-22.4	MEROPS score threshold (-22.7)	76	86.88
UMOD-P3	P07911	598	606	N-terminus	MMP2 (P08253; MMP2_HUMAN). Mmp2 (P33434; MMP2_MOUSE). Mmp2 (P33436; MMP2_RAT)	DQSRVLNL	MEROPS:M10.003	Endopeptidase (input)	-22.48	MEROPS score threshold (-22.7)	76	86.88
UMOD-P3	P07911	601	606	N-terminus	MMP2 (P08253; MMP2_HUMAN). Mmp2 (P33434; MMP2_MOUSE). Mmp2 (P33436; MMP2_RAT)	RVLNLGPI	MEROPS:M10.003	Endopeptidase (input)	-22.4	MEROPS score threshold (-22.7)	76	86.88
UMOD-P3	P07911	595	600	C-terminus	MMP2 (P08253; MMP2_HUMAN). Mmp2 (P33434; MMP2_MOUSE). Mmp2 (P33436; MMP2_RAT)	RVLNLGPI	MEROPS:M10.003	Endopeptidase (input)	-22.4	MEROPS score threshold (-22.7)	76	86.88
UMOD-P3	P07911	596	605	C-terminus	Mmp12 (P34960; MMP12_MOUSE). MMP12 (P39900; MMP12_HUMAN). Mmp12 (Q63341; MMP12_RAT)	GPITRKGV	MEROPS:M10.009	Endopeptidase (input)	-20.56	MEROPS score threshold (-22.75)	67	88.47
UMOD-P3	P07911	596	605	C-terminus	Mmp13 (P23097; MMP13_RAT). Mmp13 (P33435; MMP13_MOUSE). MMP13 (P45452; MMP13_HUMAN)	GPITRKGV	MEROPS:M10.013	Endopeptidase (input)	-20.36	MEROPS score threshold (-23.33)	70	93.66
UMOD-P3	P07911	596	603	C-terminus	MMP14 (P50281; MMP14_HUMAN). Mmp14 (P53690; MMP14_MOUSE). Mmp14 (Q10739; MMP14_RAT)	NLGPITRK	MEROPS:M10.014	Endopeptidase (input)	-21.75	MEROPS score threshold (-22.96)	75	80.66
UMOD-P3	P07911	596	600	C-terminus	Mmp12 (P34960; MMP12_MOUSE). MMP12 (P39900; MMP12_HUMAN). Mmp12 (Q63341; MMP12_RAT)	RVLNLGPI	MEROPS:M10.009	Endopeptidase (input)	-20.9	MEROPS score threshold (-22.75)	67	88.47
UMOD-P3	P07911	596	600	C-terminus	MMP14 (P50281; MMP14_HUMAN). Mmp14 (P53690; MMP14_MOUSE). Mmp14 (Q10739; MMP14_RAT)	RVLNLGPI	MEROPS:M10.014	Endopeptidase (input)	-22.2	MEROPS score threshold (-22.96)	75	80.66
UMOD-P3	P07911	597	605	C-terminus	Mmp12 (P34960; MMP12_MOUSE). MMP12 (P39900; MMP12_HUMAN). Mmp12 (Q63341; MMP12_RAT)	GPITRKGV	MEROPS:M10.009	Endopeptidase (input)	-20.56	MEROPS score threshold (-22.75)	67	88.47
UMOD-P3	P07911	597	605	C-terminus	Mmp13 (P23097; MMP13_RAT). Mmp13 (P33435; MMP13_MOUSE). MMP13 (P45452; MMP13_HUMAN)	GPITRKGV	MEROPS:M10.013	Endopeptidase (input)	-20.36	MEROPS score threshold (-23.33)	70	93.66
UMOD-P3	P07911	597	603	C-terminus	MMP14 (P50281; MMP14_HUMAN). Mmp14 (P53690; MMP14_MOUSE). Mmp14 (Q10739; MMP14_RAT)	NLGPITRK	MEROPS:M10.014	Endopeptidase (input)	-21.75	MEROPS score threshold (-22.96)	75	80.66
UMOD-P3	P07911	597	600	C-terminus	Mmp12 (P34960; MMP12_MOUSE). MMP12 (P39900; MMP12_HUMAN). Mmp12 (Q63341; MMP12_RAT)	RVLNLGPI	MEROPS:M10.009	Endopeptidase (input)	-20.9	MEROPS score threshold (-22.75)	67	88.47
UMOD-P3	P07911	597	600	C-terminus	MMP14 (P50281; MMP14_HUMAN). Mmp14 (P53690; MMP14_MOUSE). Mmp14 (Q10739; MMP14_RAT)	RVLNLGPI	MEROPS:M10.014	Endopeptidase (input)	-22.2	MEROPS score threshold (-22.96)	75	80.66
UMOD-P3	P07911	598	605	N-terminus	MMP14 (P50281; MMP14_HUMAN). Mmp14 (P53690; MMP14_MOUSE). Mmp14 (Q10739; MMP14_RAT)	DQSRVLNL	MEROPS:M10.014	Endopeptidase (input)	-22.01	MEROPS score threshold (-22.96)	75	80.66
UMOD-P3	P07911	598	605	C-terminus	Mmp12 (P34960; MMP12_MOUSE). MMP12 (P39900; MMP12_HUMAN). Mmp12 (Q63341; MMP12_RAT)	GPITRKGV	MEROPS:M10.009	Endopeptidase (input)	-20.56	MEROPS score threshold (-22.75)	67	88.47
UMOD-P3	P07911	598	605	C-terminus	Mmp13 (P23097; MMP13_RAT). Mmp13 (P33435; MMP13_MOUSE). MMP13 (P45452; MMP13_HUMAN)	GPITRKGV	MEROPS:M10.013	Endopeptidase (input)	-20.36	MEROPS score threshold (-23.33)	70	93.66
UMOD-P3	P07911	598	604	N-terminus	MMP14 (P50281; MMP14_HUMAN). Mmp14 (P53690; MMP14_MOUSE). Mmp14 (Q10739; MMP14_RAT)	DQSRVLNL	MEROPS:M10.014	Endopeptidase (input)	-22.01	MEROPS score threshold (-22.96)	75	80.66
UMOD-P3	P07911	598	603	N-terminus	MMP14 (P50281; MMP14_HUMAN). Mmp14 (P53690; MMP14_MOUSE). Mmp14 (Q10739; MMP14_RAT)	DQSRVLNL	MEROPS:M10.014	Endopeptidase (input)	-22.01	MEROPS score threshold (-22.96)	75	80.66
UMOD-P3	P07911	598	603	C-terminus	MMP14 (P50281; MMP14_HUMAN). Mmp14 (P53690; MMP14_MOUSE). Mmp14 (Q10739; MMP14_RAT)	NLGPITRK	MEROPS:M10.014	Endopeptidase (input)	-21.75	MEROPS score threshold (-22.96)	75	80.66
UMOD-P3	P07911	598	602	N-terminus	MMP14 (P50281; MMP14_HUMAN). Mmp14 (P53690; MMP14_MOUSE). Mmp14 (Q10739; MMP14_RAT)	DQSRVLNL	MEROPS:M10.014	Endopeptidase (input)	-22.01	MEROPS score threshold (-22.96)	75	80.66
UMOD-P3	P07911	598	601	N-terminus	MMP14 (P50281; MMP14_HUMAN). Mmp14 (P53690; MMP14_MOUSE). Mmp14 (Q10739; MMP14_RAT)	DQSRVLNL	MEROPS:M10.014	Endopeptidase (input)	-22.01	MEROPS score threshold (-22.96)	75	80.66
UMOD-P3	P07911	599	605	C-terminus	Mmp12 (P34960; MMP12_MOUSE). MMP12 (P39900; MMP12_HUMAN). Mmp12 (Q63341; MMP12_RAT)	GPITRKGV	MEROPS:M10.009	Endopeptidase (input)	-20.56	MEROPS score threshold (-22.75)	67	88.47
UMOD-P3	P07911	599	605	C-terminus	Mmp13 (P23097; MMP13_RAT). Mmp13 (P33435; MMP13_MOUSE). MMP13 (P45452; MMP13_HUMAN)	GPITRKGV	MEROPS:M10.013	Endopeptidase (input)	-20.36	MEROPS score threshold (-23.33)	70	93.66
UMOD-P3	P07911	599	603	C-terminus	MMP14 (P50281; MMP14_HUMAN). Mmp14 (P53690; MMP14_MOUSE). Mmp14 (Q10739; MMP14_RAT)	NLGPITRK	MEROPS:M10.014	Endopeptidase (input)	-21.75	MEROPS score threshold (-22.96)	75	80.66
UMOD-P3	P07911	600	605	C-terminus	Mmp12 (P34960; MMP12_MOUSE). MMP12 (P39900; MMP12_HUMAN). Mmp12 (Q63341; MMP12_RAT)	GPITRKGV	MEROPS:M10.009	Endopeptidase (input)	-20.56	MEROPS score threshold (-22.75)	67	88.47
UMOD-P3	P07911	600	605	C-terminus	Mmp13 (P23097; MMP13_RAT). Mmp13 (P33435; MMP13_MOUSE). MMP13 (P45452; MMP13_HUMAN)	GPITRKGV	MEROPS:M10.013	Endopeptidase (input)	-20.36	MEROPS score threshold (-23.33)	70	93.66
UMOD-P3	P07911	600	603	C-terminus	MMP14 (P50281; MMP14_HUMAN). Mmp14 (P53690; MMP14_MOUSE). Mmp14 (Q10739; MMP14_RAT)	NLGPITRK	MEROPS:M10.014	Endopeptidase (input)	-21.75	MEROPS score threshold (-22.96)	75	80.66
UMOD-P3	P07911	601	605	N-terminus	Mmp12 (P34960; MMP12_MOUSE). MMP12 (P39900; MMP12_HUMAN). Mmp12 (Q63341; MMP12_RAT)	RVLNLGPI	MEROPS:M10.009	Endopeptidase (input)	-20.9	MEROPS score threshold (-22.75)	67	88.47
UMOD-P3	P07911	601	605	N-terminus	MMP14 (P50281; MMP14_HUMAN). Mmp14 (P53690; MMP14_MOUSE). Mmp14 (Q10739; MMP14_RAT)	RVLNLGPI	MEROPS:M10.014	Endopeptidase (input)	-22.2	MEROPS score threshold (-22.96)	75	80.66
UMOD-P3	P07911	601	605	C-terminus	Mmp12 (P34960; MMP12_MOUSE). MMP12 (P39900; MMP12_HUMAN). Mmp12 (Q63341; MMP12_RAT)	GPITRKGV	MEROPS:M10.009	Endopeptidase (input)	-20.56	MEROPS score threshold (-22.75)	67	88.47
UMOD-P3	P07911	601	605	C-terminus	Mmp13 (P23097; MMP13_RAT). Mmp13 (P33435; MMP13_MOUSE). MMP13 (P45452; MMP13_HUMAN)	GPITRKGV	MEROPS:M10.013	Endopeptidase (input)	-20.36	MEROPS score threshold (-23.33)	70	93.66
UMOD-P3	P07911	601	604	N-terminus	Mmp12 (P34960; MMP12_MOUSE). MMP12 (P39900; MMP12_HUMAN). Mmp12 (Q63341; MMP12_RAT)	RVLNLGPI	MEROPS:M10.009	Endopeptidase (input)	-20.9	MEROPS score threshold (-22.75)	67	88.47
UMOD-P3	P07911	601	604	N-terminus	MMP14 (P50281; MMP14_HUMAN). Mmp14 (P53690; MMP14_MOUSE). Mmp14 (Q10739; MMP14_RAT)	RVLNLGPI	MEROPS:M10.014	Endopeptidase (input)	-22.2	MEROPS score threshold (-22.96)	75	80.66
UMOD-P3	P07911	602	605	C-terminus	Mmp12 (P34960; MMP12_MOUSE). MMP12 (P39900; MMP12_HUMAN). Mmp12 (Q63341; MMP12_RAT)	GPITRKGV	MEROPS:M10.009	Endopeptidase (input)	-20.56	MEROPS score threshold (-22.75)	67	88.47
UMOD-P3	P07911	602	605	C-terminus	Mmp13 (P23097; MMP13_RAT). Mmp13 (P33435; MMP13_MOUSE). MMP13 (P45452; MMP13_HUMAN)	GPITRKGV	MEROPS:M10.013	Endopeptidase (input)	-20.36	MEROPS score threshold (-23.33)	70	93.66
UMOD-P3	P07911	598	606	N-terminus	MMP14 (P50281; MMP14_HUMAN). Mmp14 (P53690; MMP14_MOUSE). Mmp14 (Q10739; MMP14_RAT)	DQSRVLNL	MEROPS:M10.014	Endopeptidase (input)	-22.01	MEROPS score threshold (-22.96)	75	80.66
UMOD-P3	P07911	601	606	N-terminus	Mmp12 (P34960; MMP12_MOUSE). MMP12 (P39900; MMP12_HUMAN). Mmp12 (Q63341; MMP12_RAT)	RVLNLGPI	MEROPS:M10.009	Endopeptidase (input)	-20.9	MEROPS score threshold (-22.75)	67	88.47
UMOD-P3	P07911	601	606	N-terminus	MMP14 (P50281; MMP14_HUMAN). Mmp14 (P53690; MMP14_MOUSE). Mmp14 (Q10739; MMP14_RAT)	RVLNLGPI	MEROPS:M10.014	Endopeptidase (input)	-22.2	MEROPS score threshold (-22.96)	75	80.66
UMOD-P3	P07911	595	605	C-terminus	Mmp12 (P34960; MMP12_MOUSE). MMP12 (P39900; MMP12_HUMAN). Mmp12 (Q63341; MMP12_RAT)	GPITRKGV	MEROPS:M10.009	Endopeptidase (input)	-20.56	MEROPS score threshold (-22.75)	67	88.47
UMOD-P3	P07911	595	605	C-terminus	Mmp13 (P23097; MMP13_RAT). Mmp13 (P33435; MMP13_MOUSE). MMP13 (P45452; MMP13_HUMAN)	GPITRKGV	MEROPS:M10.013	Endopeptidase (input)	-20.36	MEROPS score threshold (-23.33)	70	93.66
UMOD-P3	P07911	595	603	C-terminus	MMP14 (P50281; MMP14_HUMAN). Mmp14 (P53690; MMP14_MOUSE). Mmp14 (Q10739; MMP14_RAT)	NLGPITRK	MEROPS:M10.014	Endopeptidase (input)	-21.75	MEROPS score threshold (-22.96)	75	80.66
UMOD-P3	P07911	595	600	C-terminus	Mmp12 (P34960; MMP12_MOUSE). MMP12 (P39900; MMP12_HUMAN). Mmp12 (Q63341; MMP12_RAT)	RVLNLGPI	MEROPS:M10.009	Endopeptidase (input)	-20.9	MEROPS score threshold (-22.75)	67	88.47
UMOD-P3	P07911	595	600	C-terminus	MMP14 (P50281; MMP14_HUMAN). Mmp14 (P53690; MMP14_MOUSE). Mmp14 (Q10739; MMP14_RAT)	RVLNLGPI	MEROPS:M10.014	Endopeptidase (input)	-22.2	MEROPS score threshold (-22.96)	75	80.66
UMOD-P3	P07911	596	600	C-terminus	Mmp25 (Q3U435; MMP25_MOUSE). MMP25 (Q9NPA2; MMP25_HUMAN)	RVLNLGPI	MEROPS:M10.024	Endopeptidase (input)	-20.87	MEROPS score threshold (-24.46)	28	82.71
UMOD-P3	P07911	597	600	C-terminus	Mmp25 (Q3U435; MMP25_MOUSE). MMP25 (Q9NPA2; MMP25_HUMAN)	RVLNLGPI	MEROPS:M10.024	Endopeptidase (input)	-20.87	MEROPS score threshold (-24.46)	28	82.71
UMOD-P3	P07911	601	605	N-terminus	Mmp25 (Q3U435; MMP25_MOUSE). MMP25 (Q9NPA2; MMP25_HUMAN)	RVLNLGPI	MEROPS:M10.024	Endopeptidase (input)	-20.87	MEROPS score threshold (-24.46)	28	82.71
UMOD-P3	P07911	601	604	N-terminus	Mmp25 (Q3U435; MMP25_MOUSE). MMP25 (Q9NPA2; MMP25_HUMAN)	RVLNLGPI	MEROPS:M10.024	Endopeptidase (input)	-20.87	MEROPS score threshold (-24.46)	28	82.71
UMOD-P3	P07911	601	606	N-terminus	Mmp25 (Q3U435; MMP25_MOUSE). MMP25 (Q9NPA2; MMP25_HUMAN)	RVLNLGPI	MEROPS:M10.024	Endopeptidase (input)	-20.87	MEROPS score threshold (-24.46)	28	82.71
UMOD-P3	P07911	595	600	C-terminus	Mmp25 (Q3U435; MMP25_MOUSE). MMP25 (Q9NPA2; MMP25_HUMAN)	RVLNLGPI	MEROPS:M10.024	Endopeptidase (input)	-20.87	MEROPS score threshold (-24.46)	28	82.71
UMOD-P3	P07911	596	605	C-terminus	ADAM10 (O14672; ADA10_HUMAN). Adam10 (O35598; ADA10_MOUSE). Adam10 (Q10743; ADA10_RAT)	GPITRKGV	MEROPS:M12.210	Endopeptidase (input)	-17.37	99th percentile (-18.14)	35	99.86
UMOD-P3	P07911	596	605	C-terminus	ADAMTS4 (O75173; ATS4_HUMAN). Adamts4 (Q8BNJ2; ATS4_MOUSE)	GPITRKGV	MEROPS:M12.221	Endopeptidase (input)	-20.41	MEROPS score threshold (-23.05)	94	85.47
UMOD-P3	P07911	596	603	C-terminus	Mme (P07861; NEP_RAT). MME (P08473; NEP_HUMAN). Mme (Q61391; NEP_MOUSE)	NLGPITRK	MEROPS:M13.001	Endopeptidase (input)	-23.7	MEROPS score threshold (-24.37)	58	87.21
UMOD-P3	P07911	597	605	C-terminus	ADAM10 (O14672; ADA10_HUMAN). Adam10 (O35598; ADA10_MOUSE). Adam10 (Q10743; ADA10_RAT)	GPITRKGV	MEROPS:M12.210	Endopeptidase (input)	-17.37	99th percentile (-18.14)	35	99.86
UMOD-P3	P07911	597	605	C-terminus	ADAMTS4 (O75173; ATS4_HUMAN). Adamts4 (Q8BNJ2; ATS4_MOUSE)	GPITRKGV	MEROPS:M12.221	Endopeptidase (input)	-20.41	MEROPS score threshold (-23.05)	94	85.47
UMOD-P3	P07911	597	603	C-terminus	Mme (P07861; NEP_RAT). MME (P08473; NEP_HUMAN). Mme (Q61391; NEP_MOUSE)	NLGPITRK	MEROPS:M13.001	Endopeptidase (input)	-23.7	MEROPS score threshold (-24.37)	58	87.21
UMOD-P3	P07911	598	605	C-terminus	ADAM10 (O14672; ADA10_HUMAN). Adam10 (O35598; ADA10_MOUSE). Adam10 (Q10743; ADA10_RAT)	GPITRKGV	MEROPS:M12.210	Endopeptidase (input)	-17.37	99th percentile (-18.14)	35	99.86
UMOD-P3	P07911	598	605	C-terminus	ADAMTS4 (O75173; ATS4_HUMAN). Adamts4 (Q8BNJ2; ATS4_MOUSE)	GPITRKGV	MEROPS:M12.221	Endopeptidase (input)	-20.41	MEROPS score threshold (-23.05)	94	85.47
UMOD-P3	P07911	598	603	C-terminus	Mme (P07861; NEP_RAT). MME (P08473; NEP_HUMAN). Mme (Q61391; NEP_MOUSE)	NLGPITRK	MEROPS:M13.001	Endopeptidase (input)	-23.7	MEROPS score threshold (-24.37)	58	87.21
UMOD-P3	P07911	599	605	N-terminus	Mme (P07861; NEP_RAT). MME (P08473; NEP_HUMAN). Mme (Q61391; NEP_MOUSE)	QSRVLNLG	MEROPS:M13.001	Endopeptidase (input)	-24.03	MEROPS score threshold (-24.37)	58	87.21
UMOD-P3	P07911	599	605	C-terminus	ADAM10 (O14672; ADA10_HUMAN). Adam10 (O35598; ADA10_MOUSE). Adam10 (Q10743; ADA10_RAT)	GPITRKGV	MEROPS:M12.210	Endopeptidase (input)	-17.37	99th percentile (-18.14)	35	99.86
UMOD-P3	P07911	599	605	C-terminus	ADAMTS4 (O75173; ATS4_HUMAN). Adamts4 (Q8BNJ2; ATS4_MOUSE)	GPITRKGV	MEROPS:M12.221	Endopeptidase (input)	-20.41	MEROPS score threshold (-23.05)	94	85.47
UMOD-P3	P07911	599	604	N-terminus	Mme (P07861; NEP_RAT). MME (P08473; NEP_HUMAN). Mme (Q61391; NEP_MOUSE)	QSRVLNLG	MEROPS:M13.001	Endopeptidase (input)	-24.03	MEROPS score threshold (-24.37)	58	87.21
UMOD-P3	P07911	599	603	N-terminus	Mme (P07861; NEP_RAT). MME (P08473; NEP_HUMAN). Mme (Q61391; NEP_MOUSE)	QSRVLNLG	MEROPS:M13.001	Endopeptidase (input)	-24.03	MEROPS score threshold (-24.37)	58	87.21
UMOD-P3	P07911	599	603	C-terminus	Mme (P07861; NEP_RAT). MME (P08473; NEP_HUMAN). Mme (Q61391; NEP_MOUSE)	NLGPITRK	MEROPS:M13.001	Endopeptidase (input)	-23.7	MEROPS score threshold (-24.37)	58	87.21
UMOD-P3	P07911	599	602	N-terminus	Mme (P07861; NEP_RAT). MME (P08473; NEP_HUMAN). Mme (Q61391; NEP_MOUSE)	QSRVLNLG	MEROPS:M13.001	Endopeptidase (input)	-24.03	MEROPS score threshold (-24.37)	58	87.21
UMOD-P3	P07911	600	605	C-terminus	ADAM10 (O14672; ADA10_HUMAN). Adam10 (O35598; ADA10_MOUSE). Adam10 (Q10743; ADA10_RAT)	GPITRKGV	MEROPS:M12.210	Endopeptidase (input)	-17.37	99th percentile (-18.14)	35	99.86
UMOD-P3	P07911	600	605	C-terminus	ADAMTS4 (O75173; ATS4_HUMAN). Adamts4 (Q8BNJ2; ATS4_MOUSE)	GPITRKGV	MEROPS:M12.221	Endopeptidase (input)	-20.41	MEROPS score threshold (-23.05)	94	85.47
UMOD-P3	P07911	600	603	C-terminus	Mme (P07861; NEP_RAT). MME (P08473; NEP_HUMAN). Mme (Q61391; NEP_MOUSE)	NLGPITRK	MEROPS:M13.001	Endopeptidase (input)	-23.7	MEROPS score threshold (-24.37)	58	87.21
UMOD-P3	P07911	601	605	C-terminus	ADAM10 (O14672; ADA10_HUMAN). Adam10 (O35598; ADA10_MOUSE). Adam10 (Q10743; ADA10_RAT)	GPITRKGV	MEROPS:M12.210	Endopeptidase (input)	-17.37	99th percentile (-18.14)	35	99.86
UMOD-P3	P07911	601	605	C-terminus	ADAMTS4 (O75173; ATS4_HUMAN). Adamts4 (Q8BNJ2; ATS4_MOUSE)	GPITRKGV	MEROPS:M12.221	Endopeptidase (input)	-20.41	MEROPS score threshold (-23.05)	94	85.47
UMOD-P3	P07911	602	605	C-terminus	ADAM10 (O14672; ADA10_HUMAN). Adam10 (O35598; ADA10_MOUSE). Adam10 (Q10743; ADA10_RAT)	GPITRKGV	MEROPS:M12.210	Endopeptidase (input)	-17.37	99th percentile (-18.14)	35	99.86
UMOD-P3	P07911	602	605	C-terminus	ADAMTS4 (O75173; ATS4_HUMAN). Adamts4 (Q8BNJ2; ATS4_MOUSE)	GPITRKGV	MEROPS:M12.221	Endopeptidase (input)	-20.41	MEROPS score threshold (-23.05)	94	85.47
UMOD-P3	P07911	599	606	N-terminus	Mme (P07861; NEP_RAT). MME (P08473; NEP_HUMAN). Mme (Q61391; NEP_MOUSE)	QSRVLNLG	MEROPS:M13.001	Endopeptidase (input)	-24.03	MEROPS score threshold (-24.37)	58	87.21
UMOD-P3	P07911	595	605	C-terminus	ADAM10 (O14672; ADA10_HUMAN). Adam10 (O35598; ADA10_MOUSE). Adam10 (Q10743; ADA10_RAT)	GPITRKGV	MEROPS:M12.210	Endopeptidase (input)	-17.37	99th percentile (-18.14)	35	99.86
UMOD-P3	P07911	595	605	C-terminus	ADAMTS4 (O75173; ATS4_HUMAN). Adamts4 (Q8BNJ2; ATS4_MOUSE)	GPITRKGV	MEROPS:M12.221	Endopeptidase (input)	-20.41	MEROPS score threshold (-23.05)	94	85.47
UMOD-P3	P07911	595	603	C-terminus	Mme (P07861; NEP_RAT). MME (P08473; NEP_HUMAN). Mme (Q61391; NEP_MOUSE)	NLGPITRK	MEROPS:M13.001	Endopeptidase (input)	-23.7	MEROPS score threshold (-24.37)	58	87.21
UMOD-P3	P07911	595	598	C-terminus	Mme (P07861; NEP_RAT). MME (P08473; NEP_HUMAN). Mme (Q61391; NEP_MOUSE)	QSRVLNLG	MEROPS:M13.001	Endopeptidase (input)	-24.03	MEROPS score threshold (-24.37)	58	87.21
UMOD-P3	P07911	598	605	N-terminus	KLK5 (Q9Y337; KLK5_HUMAN)	DQSRVLNL	MEROPS:S01.017	Endopeptidase (input)	-17.28	99th percentile (-19.33)	11	99.63
UMOD-P3	P07911	598	604	N-terminus	KLK5 (Q9Y337; KLK5_HUMAN)	DQSRVLNL	MEROPS:S01.017	Endopeptidase (input)	-17.28	99th percentile (-19.33)	11	99.63
UMOD-P3	P07911	598	603	N-terminus	KLK5 (Q9Y337; KLK5_HUMAN)	DQSRVLNL	MEROPS:S01.017	Endopeptidase (input)	-17.28	99th percentile (-19.33)	11	99.63
UMOD-P3	P07911	598	602	N-terminus	KLK5 (Q9Y337; KLK5_HUMAN)	DQSRVLNL	MEROPS:S01.017	Endopeptidase (input)	-17.28	99th percentile (-19.33)	11	99.63
UMOD-P3	P07911	598	601	N-terminus	KLK5 (Q9Y337; KLK5_HUMAN)	DQSRVLNL	MEROPS:S01.017	Endopeptidase (input)	-17.28	99th percentile (-19.33)	11	99.63
UMOD-P3	P07911	598	606	N-terminus	KLK5 (Q9Y337; KLK5_HUMAN)	DQSRVLNL	MEROPS:S01.017	Endopeptidase (input)	-17.28	99th percentile (-19.33)	11	99.63
UMOD-P3	P07911	595	606	C-terminus	TMPRSS7 (Q7RTY8; TMPS7_HUMAN). Tmprss7 (Q8BIK6; TMPS7_MOUSE)	PITRKGVQ	MEROPS:S01.072	Endopeptidase (input)	-18.42	MEROPS score threshold (-22.87)	64	94.17
UMOD-P3	P07911	598	605	N-terminus	Klk14 (Q8CGR5; KLK14_MOUSE). KLK14 (Q9P0G3; KLK14_HUMAN)	DQSRVLNL	MEROPS:S01.029	Endopeptidase (input)	-17.87	99th percentile (-19.9)	26	99.75
UMOD-P3	P07911	598	604	N-terminus	Klk14 (Q8CGR5; KLK14_MOUSE). KLK14 (Q9P0G3; KLK14_HUMAN)	DQSRVLNL	MEROPS:S01.029	Endopeptidase (input)	-17.87	99th percentile (-19.9)	26	99.75
UMOD-P3	P07911	598	603	N-terminus	Klk14 (Q8CGR5; KLK14_MOUSE). KLK14 (Q9P0G3; KLK14_HUMAN)	DQSRVLNL	MEROPS:S01.029	Endopeptidase (input)	-17.87	99th percentile (-19.9)	26	99.75
UMOD-P3	P07911	598	602	N-terminus	Klk14 (Q8CGR5; KLK14_MOUSE). KLK14 (Q9P0G3; KLK14_HUMAN)	DQSRVLNL	MEROPS:S01.029	Endopeptidase (input)	-17.87	99th percentile (-19.9)	26	99.75
UMOD-P3	P07911	598	601	N-terminus	Klk14 (Q8CGR5; KLK14_MOUSE). KLK14 (Q9P0G3; KLK14_HUMAN)	DQSRVLNL	MEROPS:S01.029	Endopeptidase (input)	-17.87	99th percentile (-19.9)	26	99.75
UMOD-P3	P07911	603	606	C-terminus	TMPRSS7 (Q7RTY8; TMPS7_HUMAN). Tmprss7 (Q8BIK6; TMPS7_MOUSE)	PITRKGVQ	MEROPS:S01.072	Endopeptidase (input)	-18.42	MEROPS score threshold (-22.87)	64	94.17
UMOD-P3	P07911	596	606	C-terminus	TMPRSS7 (Q7RTY8; TMPS7_HUMAN). Tmprss7 (Q8BIK6; TMPS7_MOUSE)	PITRKGVQ	MEROPS:S01.072	Endopeptidase (input)	-18.42	MEROPS score threshold (-22.87)	64	94.17
UMOD-P3	P07911	597	606	C-terminus	TMPRSS7 (Q7RTY8; TMPS7_HUMAN). Tmprss7 (Q8BIK6; TMPS7_MOUSE)	PITRKGVQ	MEROPS:S01.072	Endopeptidase (input)	-18.42	MEROPS score threshold (-22.87)	64	94.17
UMOD-P3	P07911	598	606	N-terminus	Klk14 (Q8CGR5; KLK14_MOUSE). KLK14 (Q9P0G3; KLK14_HUMAN)	DQSRVLNL	MEROPS:S01.029	Endopeptidase (input)	-17.87	99th percentile (-19.9)	26	99.75
UMOD-P3	P07911	598	606	C-terminus	TMPRSS7 (Q7RTY8; TMPS7_HUMAN). Tmprss7 (Q8BIK6; TMPS7_MOUSE)	PITRKGVQ	MEROPS:S01.072	Endopeptidase (input)	-18.42	MEROPS score threshold (-22.87)	64	94.17
UMOD-P3	P07911	599	606	C-terminus	TMPRSS7 (Q7RTY8; TMPS7_HUMAN). Tmprss7 (Q8BIK6; TMPS7_MOUSE)	PITRKGVQ	MEROPS:S01.072	Endopeptidase (input)	-18.42	MEROPS score threshold (-22.87)	64	94.17
UMOD-P3	P07911	600	606	C-terminus	TMPRSS7 (Q7RTY8; TMPS7_HUMAN). Tmprss7 (Q8BIK6; TMPS7_MOUSE)	PITRKGVQ	MEROPS:S01.072	Endopeptidase (input)	-18.42	MEROPS score threshold (-22.87)	64	94.17
UMOD-P3	P07911	601	606	C-terminus	TMPRSS7 (Q7RTY8; TMPS7_HUMAN). Tmprss7 (Q8BIK6; TMPS7_MOUSE)	PITRKGVQ	MEROPS:S01.072	Endopeptidase (input)	-18.42	MEROPS score threshold (-22.87)	64	94.17
UMOD-P3	P07911	602	606	C-terminus	TMPRSS7 (Q7RTY8; TMPS7_HUMAN). Tmprss7 (Q8BIK6; TMPS7_MOUSE)	PITRKGVQ	MEROPS:S01.072	Endopeptidase (input)	-18.42	MEROPS score threshold (-22.87)	64	94.17
UMOD-P3	P07911	595	606	C-terminus	Gzma (P11032; GRAA_MOUSE). GZMA (P12544; GRAA_HUMAN)	PITRKGVQ	MEROPS:S01.135	Endopeptidase (input)	-18.69	MEROPS score threshold (-21.78)	80	94.96
UMOD-P3	P07911	598	605	N-terminus	Gzma (P11032; GRAA_MOUSE). GZMA (P12544; GRAA_HUMAN)	DQSRVLNL	MEROPS:S01.135	Endopeptidase (input)	-20.14	MEROPS score threshold (-21.78)	80	94.96
UMOD-P3	P07911	598	604	N-terminus	Gzma (P11032; GRAA_MOUSE). GZMA (P12544; GRAA_HUMAN)	DQSRVLNL	MEROPS:S01.135	Endopeptidase (input)	-20.14	MEROPS score threshold (-21.78)	80	94.96
UMOD-P3	P07911	598	603	N-terminus	Gzma (P11032; GRAA_MOUSE). GZMA (P12544; GRAA_HUMAN)	DQSRVLNL	MEROPS:S01.135	Endopeptidase (input)	-20.14	MEROPS score threshold (-21.78)	80	94.96
UMOD-P3	P07911	598	602	N-terminus	Gzma (P11032; GRAA_MOUSE). GZMA (P12544; GRAA_HUMAN)	DQSRVLNL	MEROPS:S01.135	Endopeptidase (input)	-20.14	MEROPS score threshold (-21.78)	80	94.96
UMOD-P3	P07911	598	601	N-terminus	Gzma (P11032; GRAA_MOUSE). GZMA (P12544; GRAA_HUMAN)	DQSRVLNL	MEROPS:S01.135	Endopeptidase (input)	-20.14	MEROPS score threshold (-21.78)	80	94.96
UMOD-P3	P07911	603	606	C-terminus	Gzma (P11032; GRAA_MOUSE). GZMA (P12544; GRAA_HUMAN)	PITRKGVQ	MEROPS:S01.135	Endopeptidase (input)	-18.69	MEROPS score threshold (-21.78)	80	94.96
UMOD-P3	P07911	596	606	C-terminus	Gzma (P11032; GRAA_MOUSE). GZMA (P12544; GRAA_HUMAN)	PITRKGVQ	MEROPS:S01.135	Endopeptidase (input)	-18.69	MEROPS score threshold (-21.78)	80	94.96
UMOD-P3	P07911	597	606	C-terminus	Gzma (P11032; GRAA_MOUSE). GZMA (P12544; GRAA_HUMAN)	PITRKGVQ	MEROPS:S01.135	Endopeptidase (input)	-18.69	MEROPS score threshold (-21.78)	80	94.96
UMOD-P3	P07911	598	606	N-terminus	Gzma (P11032; GRAA_MOUSE). GZMA (P12544; GRAA_HUMAN)	DQSRVLNL	MEROPS:S01.135	Endopeptidase (input)	-20.14	MEROPS score threshold (-21.78)	80	94.96
UMOD-P3	P07911	598	606	C-terminus	Gzma (P11032; GRAA_MOUSE). GZMA (P12544; GRAA_HUMAN)	PITRKGVQ	MEROPS:S01.135	Endopeptidase (input)	-18.69	MEROPS score threshold (-21.78)	80	94.96
UMOD-P3	P07911	599	606	C-terminus	Gzma (P11032; GRAA_MOUSE). GZMA (P12544; GRAA_HUMAN)	PITRKGVQ	MEROPS:S01.135	Endopeptidase (input)	-18.69	MEROPS score threshold (-21.78)	80	94.96
UMOD-P3	P07911	600	606	C-terminus	Gzma (P11032; GRAA_MOUSE). GZMA (P12544; GRAA_HUMAN)	PITRKGVQ	MEROPS:S01.135	Endopeptidase (input)	-18.69	MEROPS score threshold (-21.78)	80	94.96
UMOD-P3	P07911	601	606	C-terminus	Gzma (P11032; GRAA_MOUSE). GZMA (P12544; GRAA_HUMAN)	PITRKGVQ	MEROPS:S01.135	Endopeptidase (input)	-18.69	MEROPS score threshold (-21.78)	80	94.96
UMOD-P3	P07911	602	606	C-terminus	Gzma (P11032; GRAA_MOUSE). GZMA (P12544; GRAA_HUMAN)	PITRKGVQ	MEROPS:S01.135	Endopeptidase (input)	-18.69	MEROPS score threshold (-21.78)	80	94.96
UMOD-P3	P07911	596	599	C-terminus	GZMM (P51124; GRAM_HUMAN). Gzmm (Q03238; GRAM_RAT)	SRVLNLGP	MEROPS:S01.139	Endopeptidase (input)	-21.18	MEROPS score threshold (-21.93)	74	92.47
UMOD-P3	P07911	596	599	C-terminus	Mcpt3 (P21843; MCPT3_MOUSE). CMA1 (P23946; CMA1_HUMAN)	SRVLNLGP	MEROPS:S01.140	Endopeptidase (input)	-22.03	MEROPS score threshold (-23.04)	93	95.34
UMOD-P3	P07911	600	605	N-terminus	GZMM (P51124; GRAM_HUMAN). Gzmm (Q03238; GRAM_RAT)	SRVLNLGP	MEROPS:S01.139	Endopeptidase (input)	-21.18	MEROPS score threshold (-21.93)	74	92.47
UMOD-P3	P07911	600	605	N-terminus	Mcpt3 (P21843; MCPT3_MOUSE). CMA1 (P23946; CMA1_HUMAN)	SRVLNLGP	MEROPS:S01.140	Endopeptidase (input)	-22.03	MEROPS score threshold (-23.04)	93	95.34
UMOD-P3	P07911	600	604	N-terminus	GZMM (P51124; GRAM_HUMAN). Gzmm (Q03238; GRAM_RAT)	SRVLNLGP	MEROPS:S01.139	Endopeptidase (input)	-21.18	MEROPS score threshold (-21.93)	74	92.47
UMOD-P3	P07911	600	604	N-terminus	Mcpt3 (P21843; MCPT3_MOUSE). CMA1 (P23946; CMA1_HUMAN)	SRVLNLGP	MEROPS:S01.140	Endopeptidase (input)	-22.03	MEROPS score threshold (-23.04)	93	95.34
UMOD-P3	P07911	600	603	N-terminus	GZMM (P51124; GRAM_HUMAN). Gzmm (Q03238; GRAM_RAT)	SRVLNLGP	MEROPS:S01.139	Endopeptidase (input)	-21.18	MEROPS score threshold (-21.93)	74	92.47
UMOD-P3	P07911	600	603	N-terminus	Mcpt3 (P21843; MCPT3_MOUSE). CMA1 (P23946; CMA1_HUMAN)	SRVLNLGP	MEROPS:S01.140	Endopeptidase (input)	-22.03	MEROPS score threshold (-23.04)	93	95.34
UMOD-P3	P07911	600	606	N-terminus	GZMM (P51124; GRAM_HUMAN). Gzmm (Q03238; GRAM_RAT)	SRVLNLGP	MEROPS:S01.139	Endopeptidase (input)	-21.18	MEROPS score threshold (-21.93)	74	92.47
UMOD-P3	P07911	600	606	N-terminus	Mcpt3 (P21843; MCPT3_MOUSE). CMA1 (P23946; CMA1_HUMAN)	SRVLNLGP	MEROPS:S01.140	Endopeptidase (input)	-22.03	MEROPS score threshold (-23.04)	93	95.34
UMOD-P3	P07911	595	599	C-terminus	GZMM (P51124; GRAM_HUMAN). Gzmm (Q03238; GRAM_RAT)	SRVLNLGP	MEROPS:S01.139	Endopeptidase (input)	-21.18	MEROPS score threshold (-21.93)	74	92.47
UMOD-P3	P07911	595	599	C-terminus	Mcpt3 (P21843; MCPT3_MOUSE). CMA1 (P23946; CMA1_HUMAN)	SRVLNLGP	MEROPS:S01.140	Endopeptidase (input)	-22.03	MEROPS score threshold (-23.04)	93	95.34
UMOD-P3	P07911	596	599	C-terminus	KLK3 (P07288; KLK3_HUMAN)	SRVLNLGP	MEROPS:S01.162	Endopeptidase (input)	-21.68	MEROPS score threshold (-22.71)	35	97.89
UMOD-P3	P07911	600	605	N-terminus	KLK3 (P07288; KLK3_HUMAN)	SRVLNLGP	MEROPS:S01.162	Endopeptidase (input)	-21.68	MEROPS score threshold (-22.71)	35	97.89
UMOD-P3	P07911	600	604	N-terminus	KLK3 (P07288; KLK3_HUMAN)	SRVLNLGP	MEROPS:S01.162	Endopeptidase (input)	-21.68	MEROPS score threshold (-22.71)	35	97.89
UMOD-P3	P07911	600	603	N-terminus	KLK3 (P07288; KLK3_HUMAN)	SRVLNLGP	MEROPS:S01.162	Endopeptidase (input)	-21.68	MEROPS score threshold (-22.71)	35	97.89
UMOD-P3	P07911	600	606	N-terminus	KLK3 (P07288; KLK3_HUMAN)	SRVLNLGP	MEROPS:S01.162	Endopeptidase (input)	-21.68	MEROPS score threshold (-22.71)	35	97.89
UMOD-P3	P07911	595	599	C-terminus	KLK3 (P07288; KLK3_HUMAN)	SRVLNLGP	MEROPS:S01.162	Endopeptidase (input)	-21.68	MEROPS score threshold (-22.71)	35	97.89
UMOD-P3	P07911	595	606	C-terminus	Hpn (O35453; HEPS_MOUSE). HPN (P05981; HEPS_HUMAN). Hpn (Q05511; HEPS_RAT)	PITRKGVQ	MEROPS:S01.224	Endopeptidase (input)	-17.96	MEROPS score threshold (-22.19)	66	98.56
UMOD-P3	P07911	603	606	C-terminus	Hpn (O35453; HEPS_MOUSE). HPN (P05981; HEPS_HUMAN). Hpn (Q05511; HEPS_RAT)	PITRKGVQ	MEROPS:S01.224	Endopeptidase (input)	-17.96	MEROPS score threshold (-22.19)	66	98.56
UMOD-P3	P07911	596	606	C-terminus	Hpn (O35453; HEPS_MOUSE). HPN (P05981; HEPS_HUMAN). Hpn (Q05511; HEPS_RAT)	PITRKGVQ	MEROPS:S01.224	Endopeptidase (input)	-17.96	MEROPS score threshold (-22.19)	66	98.56
UMOD-P3	P07911	597	606	C-terminus	Hpn (O35453; HEPS_MOUSE). HPN (P05981; HEPS_HUMAN). Hpn (Q05511; HEPS_RAT)	PITRKGVQ	MEROPS:S01.224	Endopeptidase (input)	-17.96	MEROPS score threshold (-22.19)	66	98.56
UMOD-P3	P07911	598	606	C-terminus	Hpn (O35453; HEPS_MOUSE). HPN (P05981; HEPS_HUMAN). Hpn (Q05511; HEPS_RAT)	PITRKGVQ	MEROPS:S01.224	Endopeptidase (input)	-17.96	MEROPS score threshold (-22.19)	66	98.56
UMOD-P3	P07911	599	606	C-terminus	Hpn (O35453; HEPS_MOUSE). HPN (P05981; HEPS_HUMAN). Hpn (Q05511; HEPS_RAT)	PITRKGVQ	MEROPS:S01.224	Endopeptidase (input)	-17.96	MEROPS score threshold (-22.19)	66	98.56
UMOD-P3	P07911	600	606	C-terminus	Hpn (O35453; HEPS_MOUSE). HPN (P05981; HEPS_HUMAN). Hpn (Q05511; HEPS_RAT)	PITRKGVQ	MEROPS:S01.224	Endopeptidase (input)	-17.96	MEROPS score threshold (-22.19)	66	98.56
UMOD-P3	P07911	601	606	C-terminus	Hpn (O35453; HEPS_MOUSE). HPN (P05981; HEPS_HUMAN). Hpn (Q05511; HEPS_RAT)	PITRKGVQ	MEROPS:S01.224	Endopeptidase (input)	-17.96	MEROPS score threshold (-22.19)	66	98.56
UMOD-P3	P07911	602	606	C-terminus	Hpn (O35453; HEPS_MOUSE). HPN (P05981; HEPS_HUMAN). Hpn (Q05511; HEPS_RAT)	PITRKGVQ	MEROPS:S01.224	Endopeptidase (input)	-17.96	MEROPS score threshold (-22.19)	66	98.56
UMOD-P3	P07911	595	606	C-terminus	PLG (P00747; PLMN_HUMAN). Plg (P20918; PLMN_MOUSE). Plg (Q01177; PLMN_RAT)	PITRKGVQ	MEROPS:S01.233	Endopeptidase (input)	-22.56	MEROPS score threshold (-22.58)	70	94.16
UMOD-P3	P07911	595	606	C-terminus	KLK4 (Q9Y5K2; KLK4_HUMAN). Klk4 (Q9Z0M1; KLK4_MOUSE)	PITRKGVQ	MEROPS:S01.251	Endopeptidase (input)	-22.14	MEROPS score threshold (-22.45)	74	95.82
UMOD-P3	P07911	596	600	C-terminus	KLK4 (Q9Y5K2; KLK4_HUMAN). Klk4 (Q9Z0M1; KLK4_MOUSE)	RVLNLGPI	MEROPS:S01.251	Endopeptidase (input)	-22.4	MEROPS score threshold (-22.45)	74	95.82
UMOD-P3	P07911	596	599	C-terminus	KLK6 (Q92876; KLK6_HUMAN)	SRVLNLGP	MEROPS:S01.236	Endopeptidase (input)	-22.54	MEROPS score threshold (-23.61)	80	95.76
UMOD-P3	P07911	597	600	C-terminus	KLK4 (Q9Y5K2; KLK4_HUMAN). Klk4 (Q9Z0M1; KLK4_MOUSE)	RVLNLGPI	MEROPS:S01.251	Endopeptidase (input)	-22.4	MEROPS score threshold (-22.45)	74	95.82
UMOD-P3	P07911	598	605	N-terminus	PLG (P00747; PLMN_HUMAN). Plg (P20918; PLMN_MOUSE). Plg (Q01177; PLMN_RAT)	DQSRVLNL	MEROPS:S01.233	Endopeptidase (input)	-20.2	MEROPS score threshold (-22.58)	70	94.16
UMOD-P3	P07911	598	605	N-terminus	KLK6 (Q92876; KLK6_HUMAN)	DQSRVLNL	MEROPS:S01.236	Endopeptidase (input)	-19.97	MEROPS score threshold (-23.61)	80	95.76
UMOD-P3	P07911	598	605	N-terminus	KLK4 (Q9Y5K2; KLK4_HUMAN). Klk4 (Q9Z0M1; KLK4_MOUSE)	DQSRVLNL	MEROPS:S01.251	Endopeptidase (input)	-17.79	MEROPS score threshold (-22.45)	74	95.82
UMOD-P3	P07911	598	604	N-terminus	PLG (P00747; PLMN_HUMAN). Plg (P20918; PLMN_MOUSE). Plg (Q01177; PLMN_RAT)	DQSRVLNL	MEROPS:S01.233	Endopeptidase (input)	-20.2	MEROPS score threshold (-22.58)	70	94.16
UMOD-P3	P07911	598	604	N-terminus	KLK6 (Q92876; KLK6_HUMAN)	DQSRVLNL	MEROPS:S01.236	Endopeptidase (input)	-19.97	MEROPS score threshold (-23.61)	80	95.76
UMOD-P3	P07911	598	604	N-terminus	KLK4 (Q9Y5K2; KLK4_HUMAN). Klk4 (Q9Z0M1; KLK4_MOUSE)	DQSRVLNL	MEROPS:S01.251	Endopeptidase (input)	-17.79	MEROPS score threshold (-22.45)	74	95.82
UMOD-P3	P07911	598	603	N-terminus	PLG (P00747; PLMN_HUMAN). Plg (P20918; PLMN_MOUSE). Plg (Q01177; PLMN_RAT)	DQSRVLNL	MEROPS:S01.233	Endopeptidase (input)	-20.2	MEROPS score threshold (-22.58)	70	94.16
UMOD-P3	P07911	598	603	N-terminus	KLK6 (Q92876; KLK6_HUMAN)	DQSRVLNL	MEROPS:S01.236	Endopeptidase (input)	-19.97	MEROPS score threshold (-23.61)	80	95.76
UMOD-P3	P07911	598	603	N-terminus	KLK4 (Q9Y5K2; KLK4_HUMAN). Klk4 (Q9Z0M1; KLK4_MOUSE)	DQSRVLNL	MEROPS:S01.251	Endopeptidase (input)	-17.79	MEROPS score threshold (-22.45)	74	95.82
UMOD-P3	P07911	598	602	N-terminus	PLG (P00747; PLMN_HUMAN). Plg (P20918; PLMN_MOUSE). Plg (Q01177; PLMN_RAT)	DQSRVLNL	MEROPS:S01.233	Endopeptidase (input)	-20.2	MEROPS score threshold (-22.58)	70	94.16
UMOD-P3	P07911	598	602	N-terminus	KLK6 (Q92876; KLK6_HUMAN)	DQSRVLNL	MEROPS:S01.236	Endopeptidase (input)	-19.97	MEROPS score threshold (-23.61)	80	95.76
UMOD-P3	P07911	598	602	N-terminus	KLK4 (Q9Y5K2; KLK4_HUMAN). Klk4 (Q9Z0M1; KLK4_MOUSE)	DQSRVLNL	MEROPS:S01.251	Endopeptidase (input)	-17.79	MEROPS score threshold (-22.45)	74	95.82
UMOD-P3	P07911	598	601	N-terminus	PLG (P00747; PLMN_HUMAN). Plg (P20918; PLMN_MOUSE). Plg (Q01177; PLMN_RAT)	DQSRVLNL	MEROPS:S01.233	Endopeptidase (input)	-20.2	MEROPS score threshold (-22.58)	70	94.16
UMOD-P3	P07911	598	601	N-terminus	KLK6 (Q92876; KLK6_HUMAN)	DQSRVLNL	MEROPS:S01.236	Endopeptidase (input)	-19.97	MEROPS score threshold (-23.61)	80	95.76
UMOD-P3	P07911	598	601	N-terminus	KLK4 (Q9Y5K2; KLK4_HUMAN). Klk4 (Q9Z0M1; KLK4_MOUSE)	DQSRVLNL	MEROPS:S01.251	Endopeptidase (input)	-17.79	MEROPS score threshold (-22.45)	74	95.82
UMOD-P3	P07911	600	605	N-terminus	KLK6 (Q92876; KLK6_HUMAN)	SRVLNLGP	MEROPS:S01.236	Endopeptidase (input)	-22.54	MEROPS score threshold (-23.61)	80	95.76
UMOD-P3	P07911	600	604	N-terminus	KLK6 (Q92876; KLK6_HUMAN)	SRVLNLGP	MEROPS:S01.236	Endopeptidase (input)	-22.54	MEROPS score threshold (-23.61)	80	95.76
UMOD-P3	P07911	600	603	N-terminus	KLK6 (Q92876; KLK6_HUMAN)	SRVLNLGP	MEROPS:S01.236	Endopeptidase (input)	-22.54	MEROPS score threshold (-23.61)	80	95.76
UMOD-P3	P07911	601	605	N-terminus	KLK4 (Q9Y5K2; KLK4_HUMAN). Klk4 (Q9Z0M1; KLK4_MOUSE)	RVLNLGPI	MEROPS:S01.251	Endopeptidase (input)	-22.4	MEROPS score threshold (-22.45)	74	95.82
UMOD-P3	P07911	601	604	N-terminus	KLK4 (Q9Y5K2; KLK4_HUMAN). Klk4 (Q9Z0M1; KLK4_MOUSE)	RVLNLGPI	MEROPS:S01.251	Endopeptidase (input)	-22.4	MEROPS score threshold (-22.45)	74	95.82
UMOD-P3	P07911	603	606	C-terminus	PLG (P00747; PLMN_HUMAN). Plg (P20918; PLMN_MOUSE). Plg (Q01177; PLMN_RAT)	PITRKGVQ	MEROPS:S01.233	Endopeptidase (input)	-22.56	MEROPS score threshold (-22.58)	70	94.16
UMOD-P3	P07911	603	606	C-terminus	KLK4 (Q9Y5K2; KLK4_HUMAN). Klk4 (Q9Z0M1; KLK4_MOUSE)	PITRKGVQ	MEROPS:S01.251	Endopeptidase (input)	-22.14	MEROPS score threshold (-22.45)	74	95.82
UMOD-P3	P07911	596	606	C-terminus	PLG (P00747; PLMN_HUMAN). Plg (P20918; PLMN_MOUSE). Plg (Q01177; PLMN_RAT)	PITRKGVQ	MEROPS:S01.233	Endopeptidase (input)	-22.56	MEROPS score threshold (-22.58)	70	94.16
UMOD-P3	P07911	596	606	C-terminus	KLK4 (Q9Y5K2; KLK4_HUMAN). Klk4 (Q9Z0M1; KLK4_MOUSE)	PITRKGVQ	MEROPS:S01.251	Endopeptidase (input)	-22.14	MEROPS score threshold (-22.45)	74	95.82
UMOD-P3	P07911	597	606	C-terminus	PLG (P00747; PLMN_HUMAN). Plg (P20918; PLMN_MOUSE). Plg (Q01177; PLMN_RAT)	PITRKGVQ	MEROPS:S01.233	Endopeptidase (input)	-22.56	MEROPS score threshold (-22.58)	70	94.16
UMOD-P3	P07911	597	606	C-terminus	KLK4 (Q9Y5K2; KLK4_HUMAN). Klk4 (Q9Z0M1; KLK4_MOUSE)	PITRKGVQ	MEROPS:S01.251	Endopeptidase (input)	-22.14	MEROPS score threshold (-22.45)	74	95.82
UMOD-P3	P07911	598	606	N-terminus	PLG (P00747; PLMN_HUMAN). Plg (P20918; PLMN_MOUSE). Plg (Q01177; PLMN_RAT)	DQSRVLNL	MEROPS:S01.233	Endopeptidase (input)	-20.2	MEROPS score threshold (-22.58)	70	94.16
UMOD-P3	P07911	598	606	N-terminus	KLK6 (Q92876; KLK6_HUMAN)	DQSRVLNL	MEROPS:S01.236	Endopeptidase (input)	-19.97	MEROPS score threshold (-23.61)	80	95.76
UMOD-P3	P07911	598	606	N-terminus	KLK4 (Q9Y5K2; KLK4_HUMAN). Klk4 (Q9Z0M1; KLK4_MOUSE)	DQSRVLNL	MEROPS:S01.251	Endopeptidase (input)	-17.79	MEROPS score threshold (-22.45)	74	95.82
UMOD-P3	P07911	598	606	C-terminus	PLG (P00747; PLMN_HUMAN). Plg (P20918; PLMN_MOUSE). Plg (Q01177; PLMN_RAT)	PITRKGVQ	MEROPS:S01.233	Endopeptidase (input)	-22.56	MEROPS score threshold (-22.58)	70	94.16
UMOD-P3	P07911	598	606	C-terminus	KLK4 (Q9Y5K2; KLK4_HUMAN). Klk4 (Q9Z0M1; KLK4_MOUSE)	PITRKGVQ	MEROPS:S01.251	Endopeptidase (input)	-22.14	MEROPS score threshold (-22.45)	74	95.82
UMOD-P3	P07911	599	606	C-terminus	PLG (P00747; PLMN_HUMAN). Plg (P20918; PLMN_MOUSE). Plg (Q01177; PLMN_RAT)	PITRKGVQ	MEROPS:S01.233	Endopeptidase (input)	-22.56	MEROPS score threshold (-22.58)	70	94.16
UMOD-P3	P07911	599	606	C-terminus	KLK4 (Q9Y5K2; KLK4_HUMAN). Klk4 (Q9Z0M1; KLK4_MOUSE)	PITRKGVQ	MEROPS:S01.251	Endopeptidase (input)	-22.14	MEROPS score threshold (-22.45)	74	95.82
UMOD-P3	P07911	600	606	N-terminus	KLK6 (Q92876; KLK6_HUMAN)	SRVLNLGP	MEROPS:S01.236	Endopeptidase (input)	-22.54	MEROPS score threshold (-23.61)	80	95.76
UMOD-P3	P07911	600	606	C-terminus	PLG (P00747; PLMN_HUMAN). Plg (P20918; PLMN_MOUSE). Plg (Q01177; PLMN_RAT)	PITRKGVQ	MEROPS:S01.233	Endopeptidase (input)	-22.56	MEROPS score threshold (-22.58)	70	94.16
UMOD-P3	P07911	600	606	C-terminus	KLK4 (Q9Y5K2; KLK4_HUMAN). Klk4 (Q9Z0M1; KLK4_MOUSE)	PITRKGVQ	MEROPS:S01.251	Endopeptidase (input)	-22.14	MEROPS score threshold (-22.45)	74	95.82
UMOD-P3	P07911	601	606	N-terminus	KLK4 (Q9Y5K2; KLK4_HUMAN). Klk4 (Q9Z0M1; KLK4_MOUSE)	RVLNLGPI	MEROPS:S01.251	Endopeptidase (input)	-22.4	MEROPS score threshold (-22.45)	74	95.82
UMOD-P3	P07911	601	606	C-terminus	PLG (P00747; PLMN_HUMAN). Plg (P20918; PLMN_MOUSE). Plg (Q01177; PLMN_RAT)	PITRKGVQ	MEROPS:S01.233	Endopeptidase (input)	-22.56	MEROPS score threshold (-22.58)	70	94.16
UMOD-P3	P07911	601	606	C-terminus	KLK4 (Q9Y5K2; KLK4_HUMAN). Klk4 (Q9Z0M1; KLK4_MOUSE)	PITRKGVQ	MEROPS:S01.251	Endopeptidase (input)	-22.14	MEROPS score threshold (-22.45)	74	95.82
UMOD-P3	P07911	602	606	C-terminus	PLG (P00747; PLMN_HUMAN). Plg (P20918; PLMN_MOUSE). Plg (Q01177; PLMN_RAT)	PITRKGVQ	MEROPS:S01.233	Endopeptidase (input)	-22.56	MEROPS score threshold (-22.58)	70	94.16
UMOD-P3	P07911	602	606	C-terminus	KLK4 (Q9Y5K2; KLK4_HUMAN). Klk4 (Q9Z0M1; KLK4_MOUSE)	PITRKGVQ	MEROPS:S01.251	Endopeptidase (input)	-22.14	MEROPS score threshold (-22.45)	74	95.82
UMOD-P3	P07911	595	600	C-terminus	KLK4 (Q9Y5K2; KLK4_HUMAN). Klk4 (Q9Z0M1; KLK4_MOUSE)	RVLNLGPI	MEROPS:S01.251	Endopeptidase (input)	-22.4	MEROPS score threshold (-22.45)	74	95.82
UMOD-P3	P07911	595	599	C-terminus	KLK6 (Q92876; KLK6_HUMAN)	SRVLNLGP	MEROPS:S01.236	Endopeptidase (input)	-22.54	MEROPS score threshold (-23.61)	80	95.76
UMOD-P3	P07911	595	606	C-terminus	St14 (P56677; ST14_MOUSE). ST14 (Q9Y5Y6; ST14_HUMAN)	PITRKGVQ	MEROPS:S01.302	Endopeptidase (input)	-19.69	MEROPS score threshold (-20.45)	60	99.34
UMOD-P3	P07911	595	606	C-terminus	TMPRSS6 (Q8IU80; TMPS6_HUMAN). Tmprss6 (Q9DBI0; TMPS6_MOUSE)	PITRKGVQ	MEROPS:S01.308	Endopeptidase (input)	-17.32	MEROPS score threshold (-20.95)	57	98.81
UMOD-P3	P07911	596	599	C-terminus	HTRA2 (O43464; HTRA2_HUMAN). Htra2 (Q9JIY5; HTRA2_MOUSE)	SRVLNLGP	MEROPS:S01.278	Endopeptidase (input)	-21.31	MEROPS score threshold (-22.4)	64	94.69
UMOD-P3	P07911	598	605	N-terminus	TMPRSS6 (Q8IU80; TMPS6_HUMAN). Tmprss6 (Q9DBI0; TMPS6_MOUSE)	DQSRVLNL	MEROPS:S01.308	Endopeptidase (input)	-20.66	MEROPS score threshold (-20.95)	57	98.81
UMOD-P3	P07911	598	604	N-terminus	TMPRSS6 (Q8IU80; TMPS6_HUMAN). Tmprss6 (Q9DBI0; TMPS6_MOUSE)	DQSRVLNL	MEROPS:S01.308	Endopeptidase (input)	-20.66	MEROPS score threshold (-20.95)	57	98.81
UMOD-P3	P07911	598	603	N-terminus	TMPRSS6 (Q8IU80; TMPS6_HUMAN). Tmprss6 (Q9DBI0; TMPS6_MOUSE)	DQSRVLNL	MEROPS:S01.308	Endopeptidase (input)	-20.66	MEROPS score threshold (-20.95)	57	98.81
UMOD-P3	P07911	598	602	N-terminus	TMPRSS6 (Q8IU80; TMPS6_HUMAN). Tmprss6 (Q9DBI0; TMPS6_MOUSE)	DQSRVLNL	MEROPS:S01.308	Endopeptidase (input)	-20.66	MEROPS score threshold (-20.95)	57	98.81
UMOD-P3	P07911	598	601	N-terminus	TMPRSS6 (Q8IU80; TMPS6_HUMAN). Tmprss6 (Q9DBI0; TMPS6_MOUSE)	DQSRVLNL	MEROPS:S01.308	Endopeptidase (input)	-20.66	MEROPS score threshold (-20.95)	57	98.81
UMOD-P3	P07911	600	605	N-terminus	HTRA2 (O43464; HTRA2_HUMAN). Htra2 (Q9JIY5; HTRA2_MOUSE)	SRVLNLGP	MEROPS:S01.278	Endopeptidase (input)	-21.31	MEROPS score threshold (-22.4)	64	94.69
UMOD-P3	P07911	600	604	N-terminus	HTRA2 (O43464; HTRA2_HUMAN). Htra2 (Q9JIY5; HTRA2_MOUSE)	SRVLNLGP	MEROPS:S01.278	Endopeptidase (input)	-21.31	MEROPS score threshold (-22.4)	64	94.69
UMOD-P3	P07911	600	603	N-terminus	HTRA2 (O43464; HTRA2_HUMAN). Htra2 (Q9JIY5; HTRA2_MOUSE)	SRVLNLGP	MEROPS:S01.278	Endopeptidase (input)	-21.31	MEROPS score threshold (-22.4)	64	94.69
UMOD-P3	P07911	603	606	C-terminus	St14 (P56677; ST14_MOUSE). ST14 (Q9Y5Y6; ST14_HUMAN)	PITRKGVQ	MEROPS:S01.302	Endopeptidase (input)	-19.69	MEROPS score threshold (-20.45)	60	99.34
UMOD-P3	P07911	603	606	C-terminus	TMPRSS6 (Q8IU80; TMPS6_HUMAN). Tmprss6 (Q9DBI0; TMPS6_MOUSE)	PITRKGVQ	MEROPS:S01.308	Endopeptidase (input)	-17.32	MEROPS score threshold (-20.95)	57	98.81
UMOD-P3	P07911	596	606	C-terminus	St14 (P56677; ST14_MOUSE). ST14 (Q9Y5Y6; ST14_HUMAN)	PITRKGVQ	MEROPS:S01.302	Endopeptidase (input)	-19.69	MEROPS score threshold (-20.45)	60	99.34
UMOD-P3	P07911	596	606	C-terminus	TMPRSS6 (Q8IU80; TMPS6_HUMAN). Tmprss6 (Q9DBI0; TMPS6_MOUSE)	PITRKGVQ	MEROPS:S01.308	Endopeptidase (input)	-17.32	MEROPS score threshold (-20.95)	57	98.81
UMOD-P3	P07911	597	606	C-terminus	St14 (P56677; ST14_MOUSE). ST14 (Q9Y5Y6; ST14_HUMAN)	PITRKGVQ	MEROPS:S01.302	Endopeptidase (input)	-19.69	MEROPS score threshold (-20.45)	60	99.34
UMOD-P3	P07911	597	606	C-terminus	TMPRSS6 (Q8IU80; TMPS6_HUMAN). Tmprss6 (Q9DBI0; TMPS6_MOUSE)	PITRKGVQ	MEROPS:S01.308	Endopeptidase (input)	-17.32	MEROPS score threshold (-20.95)	57	98.81
UMOD-P3	P07911	598	606	N-terminus	TMPRSS6 (Q8IU80; TMPS6_HUMAN). Tmprss6 (Q9DBI0; TMPS6_MOUSE)	DQSRVLNL	MEROPS:S01.308	Endopeptidase (input)	-20.66	MEROPS score threshold (-20.95)	57	98.81
UMOD-P3	P07911	598	606	C-terminus	St14 (P56677; ST14_MOUSE). ST14 (Q9Y5Y6; ST14_HUMAN)	PITRKGVQ	MEROPS:S01.302	Endopeptidase (input)	-19.69	MEROPS score threshold (-20.45)	60	99.34
UMOD-P3	P07911	598	606	C-terminus	TMPRSS6 (Q8IU80; TMPS6_HUMAN). Tmprss6 (Q9DBI0; TMPS6_MOUSE)	PITRKGVQ	MEROPS:S01.308	Endopeptidase (input)	-17.32	MEROPS score threshold (-20.95)	57	98.81
UMOD-P3	P07911	599	606	C-terminus	St14 (P56677; ST14_MOUSE). ST14 (Q9Y5Y6; ST14_HUMAN)	PITRKGVQ	MEROPS:S01.302	Endopeptidase (input)	-19.69	MEROPS score threshold (-20.45)	60	99.34
UMOD-P3	P07911	599	606	C-terminus	TMPRSS6 (Q8IU80; TMPS6_HUMAN). Tmprss6 (Q9DBI0; TMPS6_MOUSE)	PITRKGVQ	MEROPS:S01.308	Endopeptidase (input)	-17.32	MEROPS score threshold (-20.95)	57	98.81
UMOD-P3	P07911	600	606	N-terminus	HTRA2 (O43464; HTRA2_HUMAN). Htra2 (Q9JIY5; HTRA2_MOUSE)	SRVLNLGP	MEROPS:S01.278	Endopeptidase (input)	-21.31	MEROPS score threshold (-22.4)	64	94.69
UMOD-P3	P07911	600	606	C-terminus	St14 (P56677; ST14_MOUSE). ST14 (Q9Y5Y6; ST14_HUMAN)	PITRKGVQ	MEROPS:S01.302	Endopeptidase (input)	-19.69	MEROPS score threshold (-20.45)	60	99.34
UMOD-P3	P07911	600	606	C-terminus	TMPRSS6 (Q8IU80; TMPS6_HUMAN). Tmprss6 (Q9DBI0; TMPS6_MOUSE)	PITRKGVQ	MEROPS:S01.308	Endopeptidase (input)	-17.32	MEROPS score threshold (-20.95)	57	98.81
UMOD-P3	P07911	601	606	C-terminus	St14 (P56677; ST14_MOUSE). ST14 (Q9Y5Y6; ST14_HUMAN)	PITRKGVQ	MEROPS:S01.302	Endopeptidase (input)	-19.69	MEROPS score threshold (-20.45)	60	99.34
UMOD-P3	P07911	601	606	C-terminus	TMPRSS6 (Q8IU80; TMPS6_HUMAN). Tmprss6 (Q9DBI0; TMPS6_MOUSE)	PITRKGVQ	MEROPS:S01.308	Endopeptidase (input)	-17.32	MEROPS score threshold (-20.95)	57	98.81
UMOD-P3	P07911	602	606	C-terminus	St14 (P56677; ST14_MOUSE). ST14 (Q9Y5Y6; ST14_HUMAN)	PITRKGVQ	MEROPS:S01.302	Endopeptidase (input)	-19.69	MEROPS score threshold (-20.45)	60	99.34
UMOD-P3	P07911	602	606	C-terminus	TMPRSS6 (Q8IU80; TMPS6_HUMAN). Tmprss6 (Q9DBI0; TMPS6_MOUSE)	PITRKGVQ	MEROPS:S01.308	Endopeptidase (input)	-17.32	MEROPS score threshold (-20.95)	57	98.81
UMOD-P3	P07911	595	599	C-terminus	HTRA2 (O43464; HTRA2_HUMAN). Htra2 (Q9JIY5; HTRA2_MOUSE)	SRVLNLGP	MEROPS:S01.278	Endopeptidase (input)	-21.31	MEROPS score threshold (-22.4)	64	94.69
Generated by http://proteasix.cs.manchester.ac.uk on Thu Jan 20 2022 15:45:14 GMT-0300 (Brasilia Standard Time)
